# Supplementary material
Source: Royal Society of Chemistry journal article supplement (doi:10.1039/d5fo05213k)

## Supplementary Information

### **Diphlorethohydroxycarmalol isolated from *Ishige okamurae* improves age-related muscle dysfunction by Ca<sup>2+</sup>-dependent response via SirT1/PGC-1 $\alpha$ pathway in *in vitro* and *in vivo***

Xueyu Wang<sup>1</sup>, Chan-Young Kim<sup>1</sup>, Jun-Geon Je<sup>1</sup>, Yujin Roh<sup>1</sup>, Fengqi Yang<sup>1</sup>, Hye-Won Yang<sup>1\*</sup>, You-Jin Jeon<sup>1,2\*</sup>

<sup>1</sup>Department of Marine Life Science, Jeju National University, Jeju. 63243, Republic of Korea

<sup>2</sup>Marine Science Institute, Jeju National University, Jeju. 63333, Republic of Korea

\* Corresponding author:

Hye-Won Yang: [hyewon.yang@jejunu.ac.kr](mailto:hyewon.yang@jejunu.ac.kr); You-Jin Jeon: [youjin2014@gmail.com](mailto:youjin2014@gmail.com)

**Figure S1:** Chemical structure and purity characterization of DPHC.

**Figure S2:** DPHC regulated intracellular calcium ion ( $\text{Ca}^{2+}$ ) levels in C2C12 cells.

**Figure S3:** Original Western blotting images presented in this study.

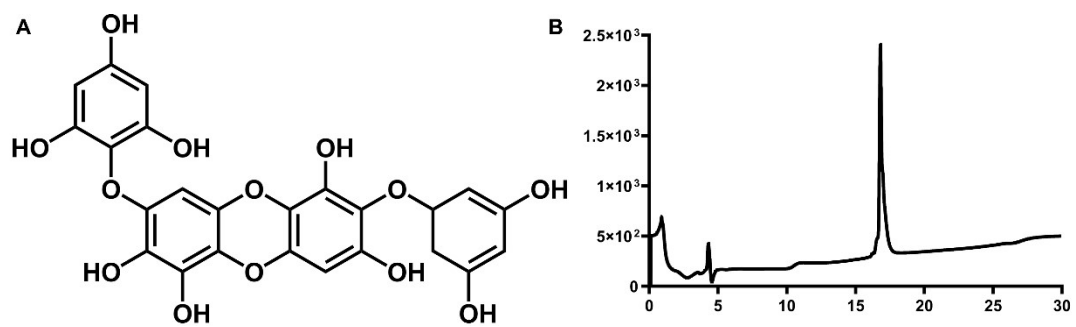

**Figure S1:** Chemical structure and purity characterization of DPHC. **(A)** Chemical structure of DPHC. **(B)** Purity analysis of DPHC was determined by chromatographic profiling.

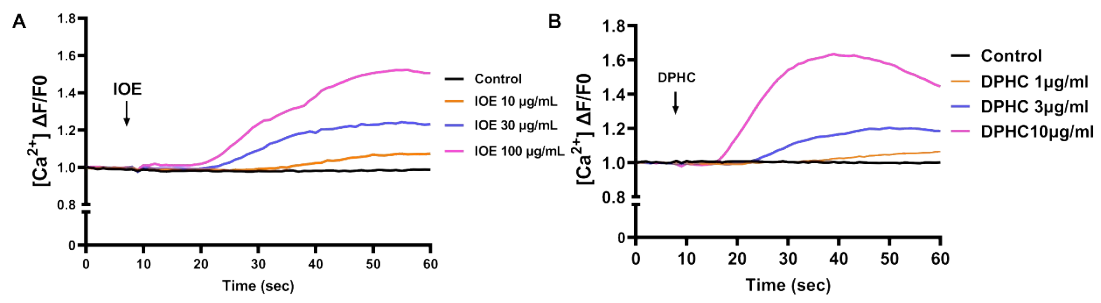

**Figure S2:** DPHC regulated intracellular calcium ion (Ca<sup>2+</sup>) levels in C2C12 cells. **(A)** Changes in intracellular Ca<sup>2+</sup> levels after IOE treatment in C2C12 cells. **(B)** Changes in intracellular Ca<sup>2+</sup> levels after DPHC treatment in C2C12 cells. All data were expressed as mean ± SEM (n = 3).

**Figure S3:** Original Western blotting images presented in this study.  
Uncropped blots for Figure 5A

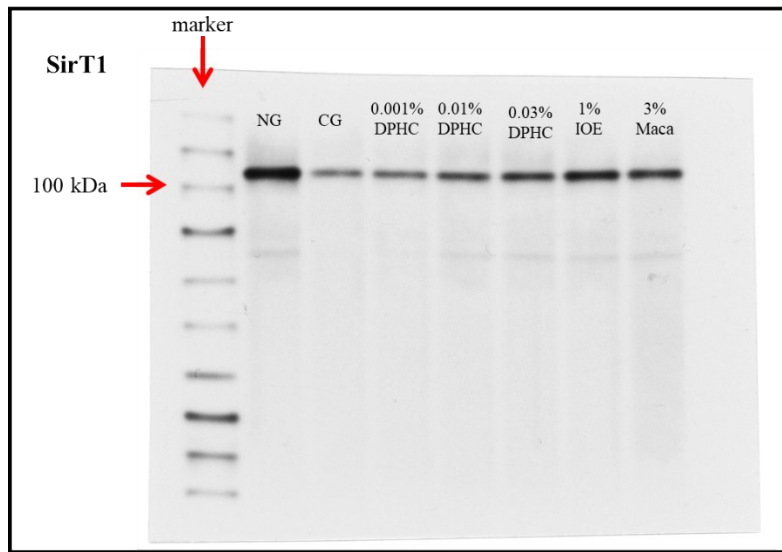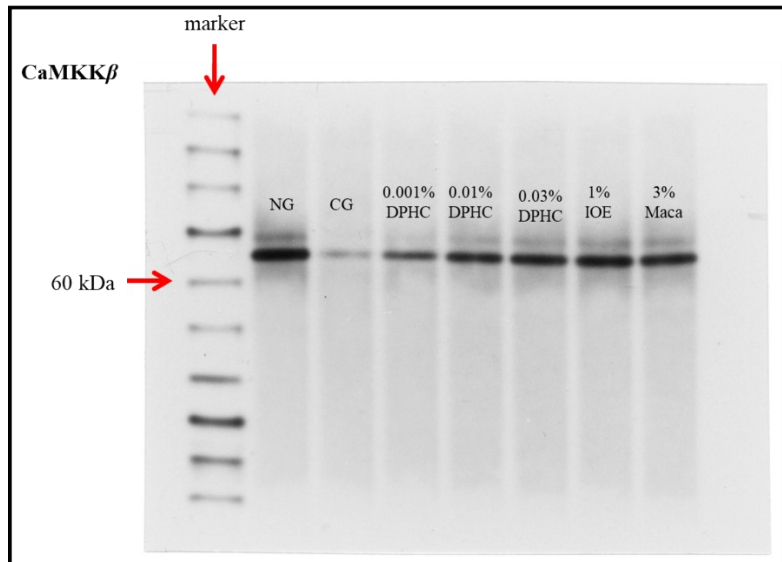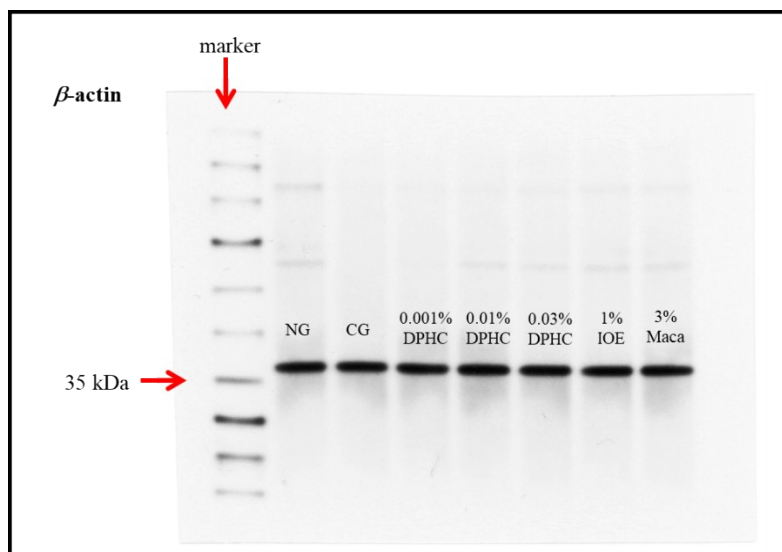

Uncropped blots for Figure 5D

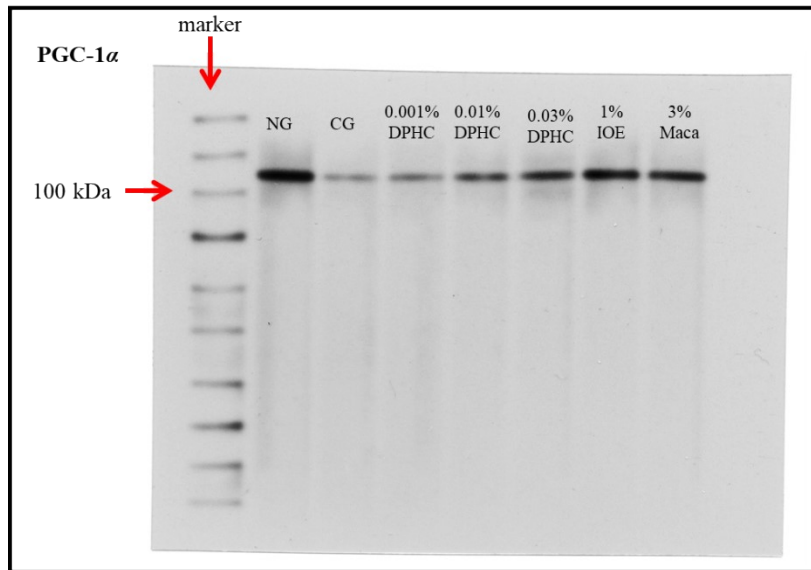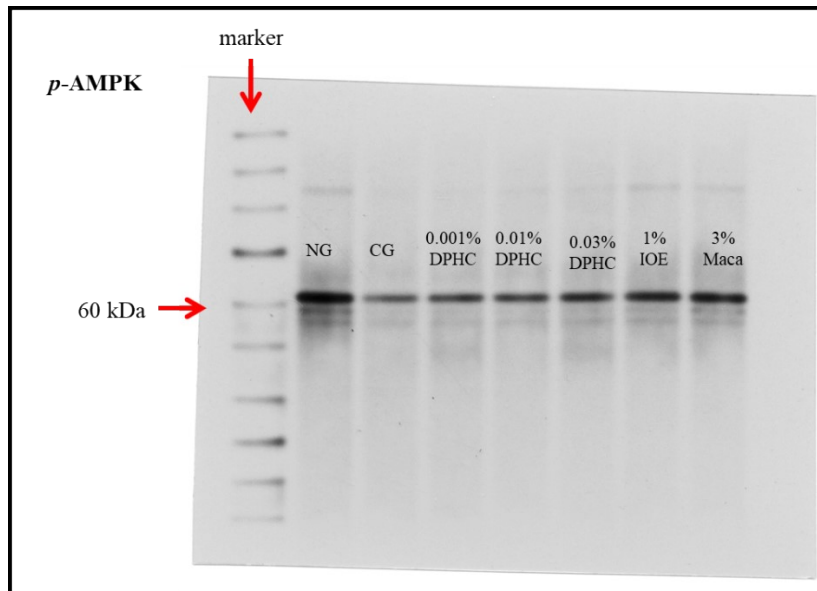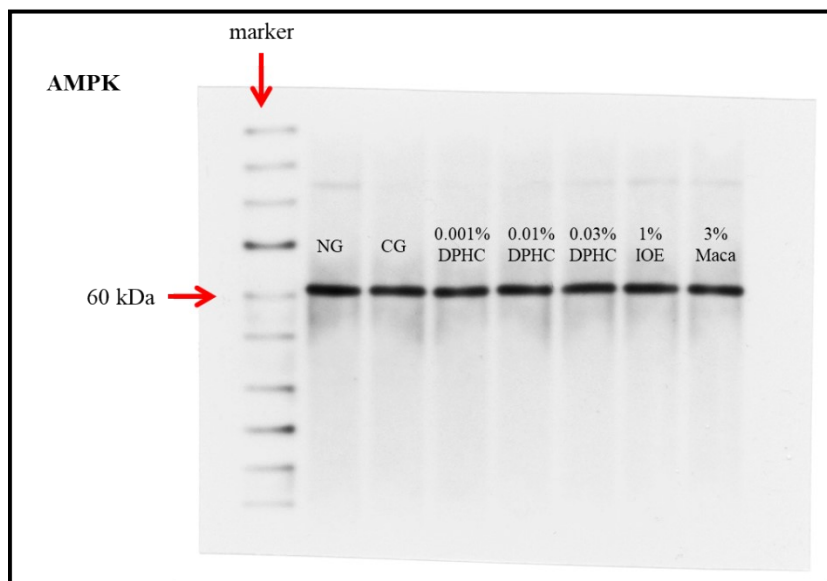

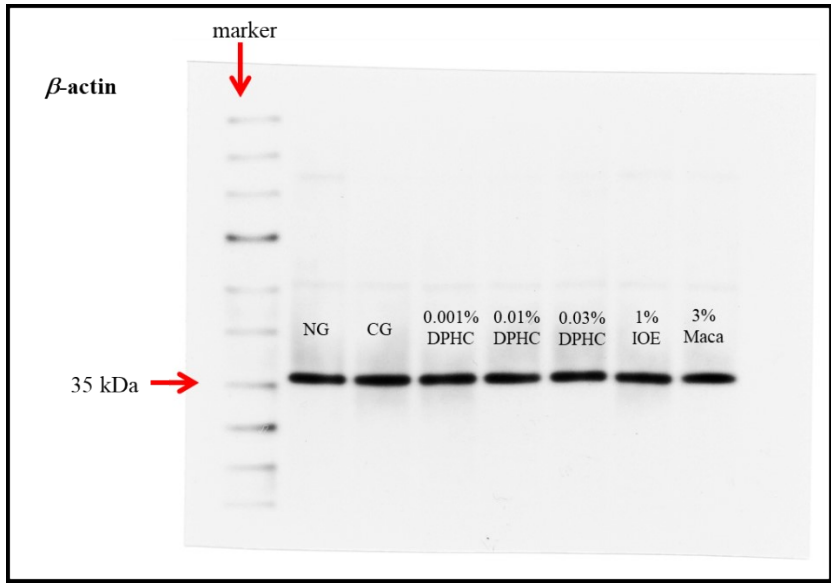

Supplement: d5fo05213k1.pdf [file d5fo05213k1.pdf]
